# Supplementary material
Source: Elsevier journal article supplement (https://www.sciencedirect.com/science/article/pii/S1885585726000769)
Supplement: mmc1 [file mmc1.pdf]

## SUPPLEMENTARY DATA

**Table S1.** Additional baseline characteristics according to type of infarction and treatment allocation

|                                                | STEMI            |                  | NSTEMI           |                  |
|------------------------------------------------|------------------|------------------|------------------|------------------|
|                                                | Beta-blocker     | No beta-blocker  | Beta-blocker     | No beta-blocker  |
|                                                | n = 2146         | n = 2150         | n = 2061         | n = 2081         |
| <i>Laboratory data</i>                         |                  |                  |                  |                  |
| Creatinine prior to discharge $\pm$ mg/dL      | 0.9 $\pm$ 0.3    | 0.9 $\pm$ 0.5    | 0.9 $\pm$ 0.3    | 0.9 $\pm$ 0.     |
| eGFR $\pm$ mL/min/1.73 m <sup>2</sup>          | 91.0 $\pm$ 18.0  | 91.5 $\pm$ 1 8.2 | 88.3 $\pm$ 18.8  | 88.5 $\pm$ 18.5  |
| Hemoglobin prior to discharge, $\pm$ g/dL      | 14.1 $\pm$ 1.6   | 14.2 $\pm$ 1.7   | 14.3 $\pm$ 1.7   | 14.2 $\pm$ 1.7   |
| LDL cholesterol at discharge $\pm$ mg/dL)      | 13.7 $\pm$ 39.0  | 112.1 $\pm$ 39.4 | 109.6 $\pm$ 42.1 | 109.1 $\pm$ 40.1 |
| <i>ECG and blood pressure at randomization</i> |                  |                  |                  |                  |
| Atrial fibrillation                            | 7 (0.4)          | 9 ( 0.5)         | 29 (1.7)         | 19 (1.1)         |
| Heart rate at discharge, bpm                   | 67.5 $\pm$ 10.6  | 68.8 $\pm$ 11.4  | 67.6 $\pm$ 11.1  | 68.3 $\pm$ 11.4  |
| SBP at discharge $\pm$ mmHg                    | 118.7 $\pm$ 15.1 | 119.5 $\pm$ 14.0 | 122.2 $\pm$ 16.3 | 123.8 $\pm$ 15.  |
| DBP at discharge $\pm$ mmHg                    | 71.5 $\pm$ 9.8   | 72.5 $\pm$ 9.5   | 72.8 $\pm$ 9.2   | 73.6 $\pm$ 9.8   |

The data are expressed as No.(%) or mean  $\pm$  standard deviation.

**Table S2.** Summary of clinical events

|                                                                           | STEMI                                              |                 | NSTEMI       |                 |
|---------------------------------------------------------------------------|----------------------------------------------------|-----------------|--------------|-----------------|
|                                                                           | Beta-blocker                                       | No beta-blocker | Beta-blocker | No beta-blocker |
|                                                                           | No. patients experiencing event ±total no. events) |                 |              |                 |
| <b>Primary endpoint</b>                                                   |                                                    |                 |              |                 |
| <i>All-cause death, nonfatal reinfarction and heart failure admission</i> | 149 ±168                                           | 119 ±132        | 167 ±192     | 188 ±238)       |
| <b>Secondary endpoints</b>                                                |                                                    |                 |              |                 |
| <i>All-cause death</i>                                                    | 77                                                 | 57              | 84           | 96              |
| Cardiac death                                                             | 28                                                 | 20              | 37           | 37              |
| Noncardiac death                                                          | 49                                                 | 37              | 47           | 59              |
| <i>Nonfatal reinfarction</i>                                              | 70 ± 76                                            | 56 ± 61         | 73 ± 78      | 87 ±104)        |
| <i>Heart failure admission</i>                                            | 13 ± 15                                            | 11 ± 13         | 26 ± 30      | 33 ±38)         |
|                                                                           |                                                    |                 |              |                 |
| <i>Sustained ventricular tachycardia</i>                                  | 2 ± 2                                              | 1 ± 1           | 1 ± 1        | 1 ±2)           |
| <i>Ventricular fibrillation</i>                                           | 2 ± 2                                              | 2 ± 2           | 1 ± 1        | 3 ±3)           |
| <i>Resuscitated cardiac arrest</i>                                        | 4 ± 4                                              | 1 ± 1           | 0 ±0         | 3 ±3)           |
| <b>Tertiary safety endpoint</b>                                           |                                                    |                 |              |                 |
| Admission for stroke                                                      | 13 ± 13                                            | 15 ± 16         | 24 ±2 4      | 10 ±11)         |

The data are expressed as No. (%) or mean ± standard deviation.

**Table S3.** Per-protocol analysis of primary, secondary and tertiary endpoints at which patients were censored at the visit a crossover is reported

|                                                                    | STEMI                         |                 |                          |                   | NSTEMI                        |                 |                         |                  | P for interaction |
|--------------------------------------------------------------------|-------------------------------|-----------------|--------------------------|-------------------|-------------------------------|-----------------|-------------------------|------------------|-------------------|
|                                                                    | N ±rate per 1000 person-years |                 | Rate difference ± ±95%CI | HR ± 95% CI       | N ±rate per 1000 person-years |                 | Rate difference ± 95%CI | HR ± 95%CI       |                   |
|                                                                    | Beta-blocker                  | No beta-blocker |                          |                   | Beta-blocker                  | No beta-blocker |                         |                  |                   |
| <b>Primary endpoint</b>                                            |                               |                 |                          |                   |                               |                 |                         |                  |                   |
| All-cause death, nonfatal reinfarction and heart failure admission | 130 ±20.1                     | 100 ±15.9       | 4.12 ±0.53, 8.78         | 1.26 ±0.97, 1.64  | 148 ±24.1                     | 160 ±27.1       | -±.04 ±-8.76, 2.68      | 0.89 ±0.71, 1.11 | 0.046             |
| <b>Secondary endpoints</b>                                         |                               |                 |                          |                   |                               |                 |                         |                  |                   |
| All-cause death                                                    | 70 ±10.6                      | 47 ±7.4         | 3.18 ± 0.09, 6.46        | 1.43 ±0.99, 2.07  | 68 ±10.8                      | 75 ±12.6        | -1.75 ±-5.58, 2.09      | 0.86 ±0.62, 1.20 | 0.043             |
| Nonfatal reinfarction                                              | 60 ±9.2                       | 48 ±7.7         | 1.59 ±-1.59, 4.78        | 1.21 ±0.83, 1.77  | 69 ±11.2                      | 76 ±12.9        | -1.67 ±-5.58, 2.25      | 0.87 ±0.63, 1.21 | 0.20              |
| Heart failure admission                                            | 11 ±1.7                       | 8 ±1.3          | 0.41 ±-0.91, 1.73        | 1.33 ±0.53, 3.30  | 24 ±3.8                       | 25 ±4.2         | -0.37 ±-2.62, 1.88      | 0.92 ±0.52, 1.61 | 0.50              |
| Cardiovascular death                                               | 25 ±3.8                       | 16 ±2.5         | 1.26 ±-0.67, 3.20        | 1.50 ±0.80, 2.82  | 32 ±5.1                       | 29 ±4.9         | 0.23 ±-2.27, 2.73       | 1.05 ±0.64, 1.74 | 0.38              |
| Sustained ventricular tachycardia                                  | 2 ±0.3                        | 1 ±0.2          | 0.15 ±-0.38, 0.67        | 1.94 ±0.18, 21.41 | 1 ±0.2                        | 0 ±0.0          | 0.16 ±-0.15, 0.47       | --               | --                |

|                                  |         |         |                       |                      |         |        |                       |                     |      |
|----------------------------------|---------|---------|-----------------------|----------------------|---------|--------|-----------------------|---------------------|------|
| Ventricular fibrillation         | 1 ±0.2  | 2 ±0.3  | -0.16 ±-0.69,<br>0.37 | 0.48 ±0.04,<br>5.33  | 1 ±0.2  | 2 ±0.3 | -0.18 ±-0.74,<br>0.38 | 0.48 ±0.04,<br>5.24 | 0.99 |
| Resuscitated cardiac arrest      | 3 ±0.5  | 1 ±0.2  | 0.30 ±-0.30,<br>0.90  | 2.91 ±0.30,<br>27.97 | 0 ±0.0  | 1 ±0.2 | -0.17 ±-0.50,<br>0.16 | --                  | --   |
| <b>Tertiary safety endpoints</b> |         |         |                       |                      |         |        |                       |                     |      |
| Admission for stroke             | 12 ±1.8 | 11 ±1.7 | 0.08 ±-1.38,<br>1.54  | 1.05 ±0.46,<br>2.37  | 23 ±3.7 | 9 ±1.5 | 2.18 ±0.37,<br>3.98   | 2.45 ±1.13,<br>5.29 | 0.14 |

Hazard ratios were estimated using Cox proportional hazards models with an interaction between MI type and treatment arm and estimate the effect of taking beta-blocker vs no beta-blocker. Gvalues were calculated using likelihood ratio tests.
